# Supplementary material for: First-line immune-based combinations or sunitinib in favorable-risk metastatic renal cell carcinoma: a real-world retrospective comparison from the ARON-1 study
Source: Springer Nature journal article supplement (doi:10.1007/s00262-024-03897-x), 2025-01-03
Supplement: MOESM1 [file 262_2024_3897_MOESM1_ESM.pdf]

## Supplementary materials

**Figure Supplementary 1.** Patients' selection process from the ARON-1 study.

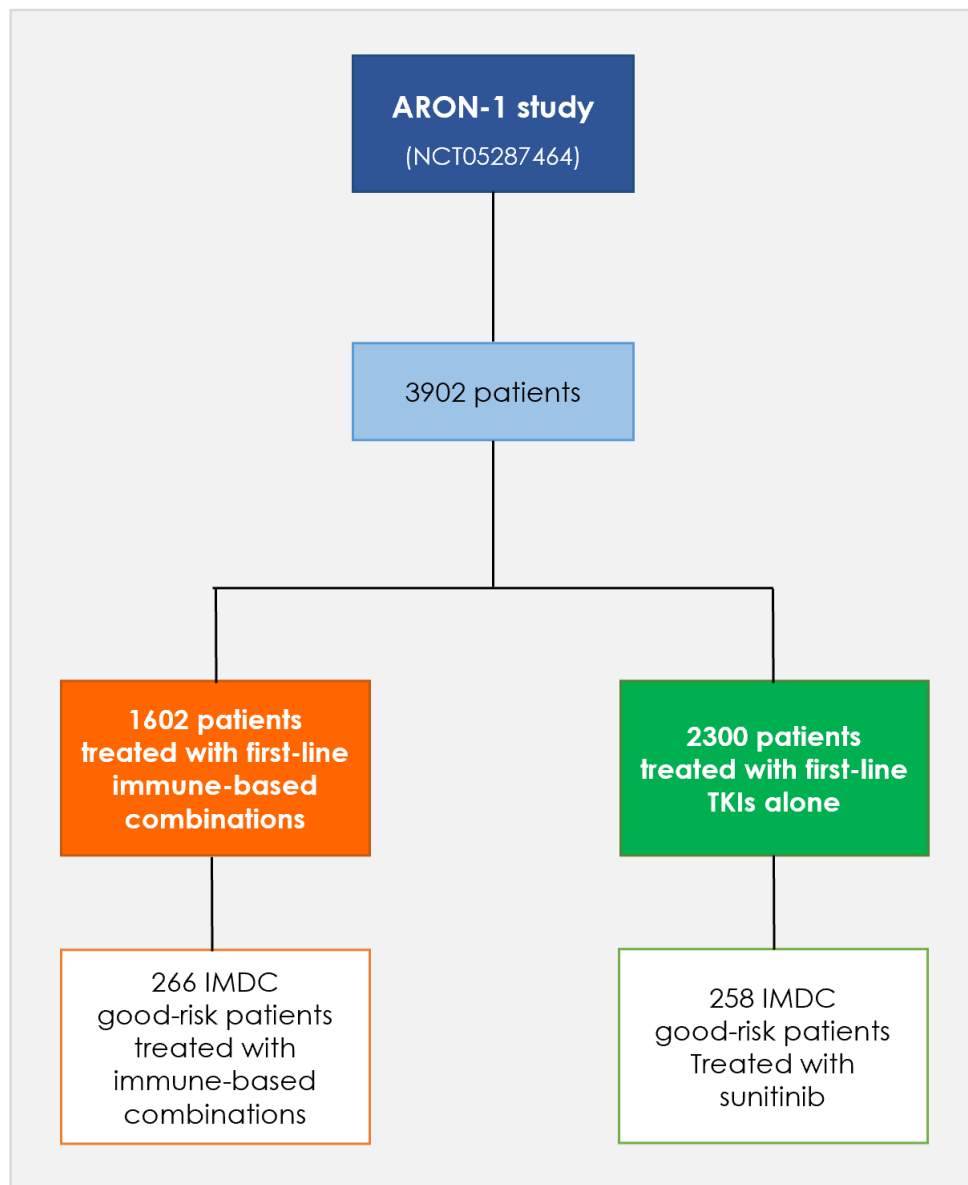

**Figure Supplementary 2.** Duration of response of first-line therapy.

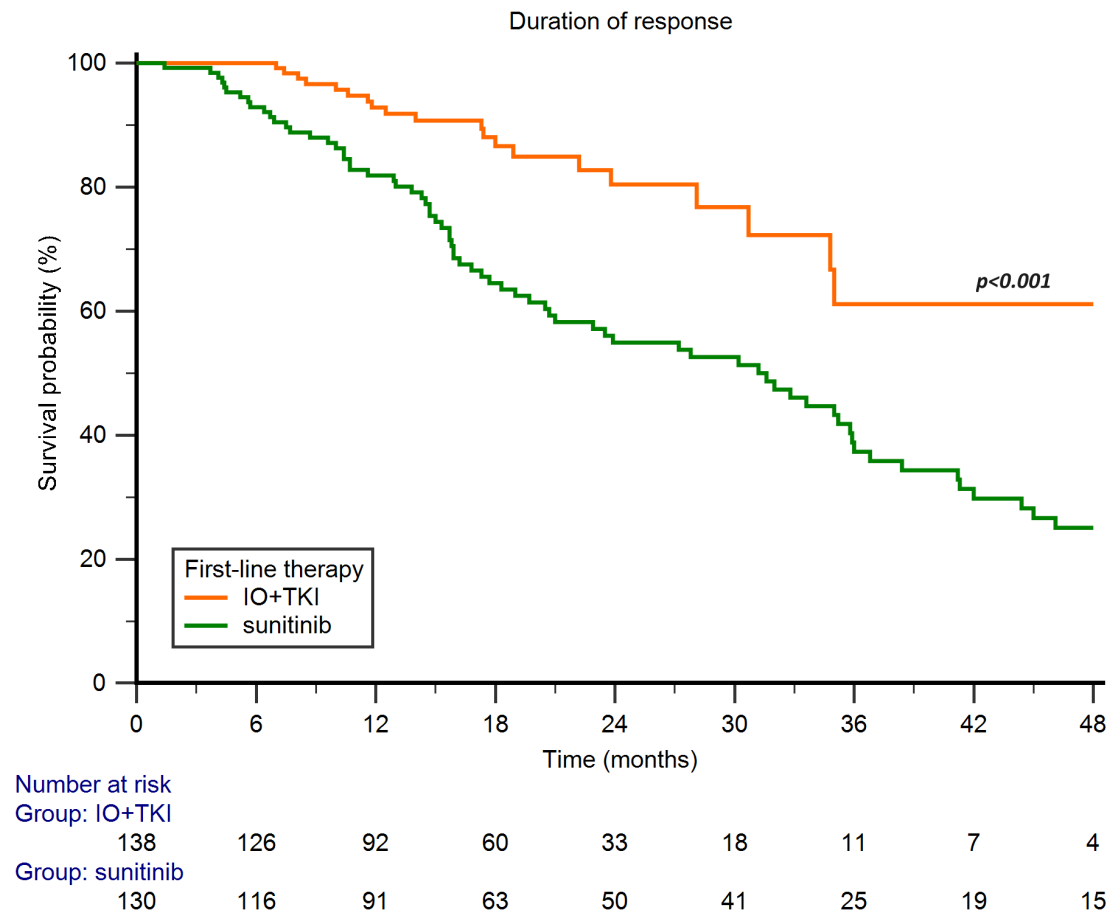

**Figure Supplementary 3.** Progression-Free Survival 2 in favorable-risk patients treated by IO + TKI or sunitinib.

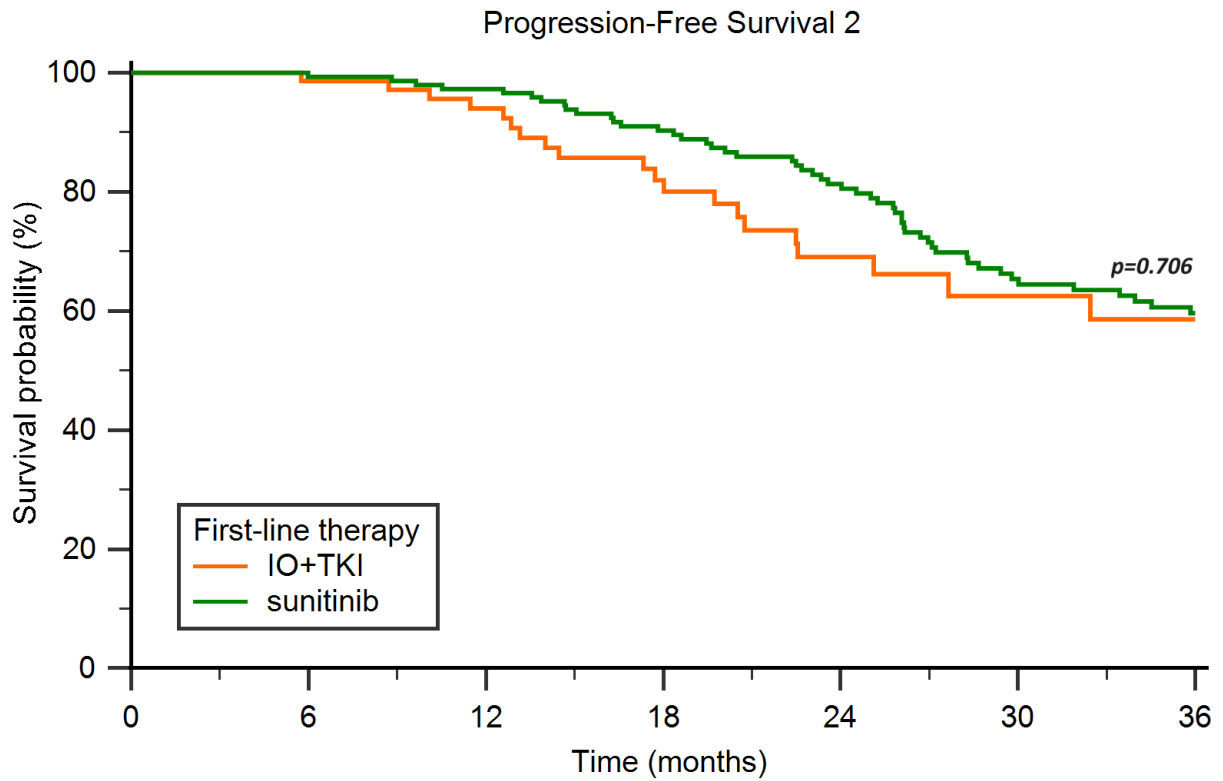

| Number at risk   |  | 0   | 6   | 12  | 18  | 24  | 30 | 36 |
|------------------|--|-----|-----|-----|-----|-----|----|----|
| Group: IO+TKI    |  | 77  | 71  | 57  | 43  | 29  | 16 | 14 |
| Group: sunitinib |  | 149 | 147 | 142 | 125 | 103 | 72 | 61 |

**Figure Supplementary 4.** Ideal candidate to IO+TKI or TKI basing on the 2y-OS rate in favorable-risk RCC patients.

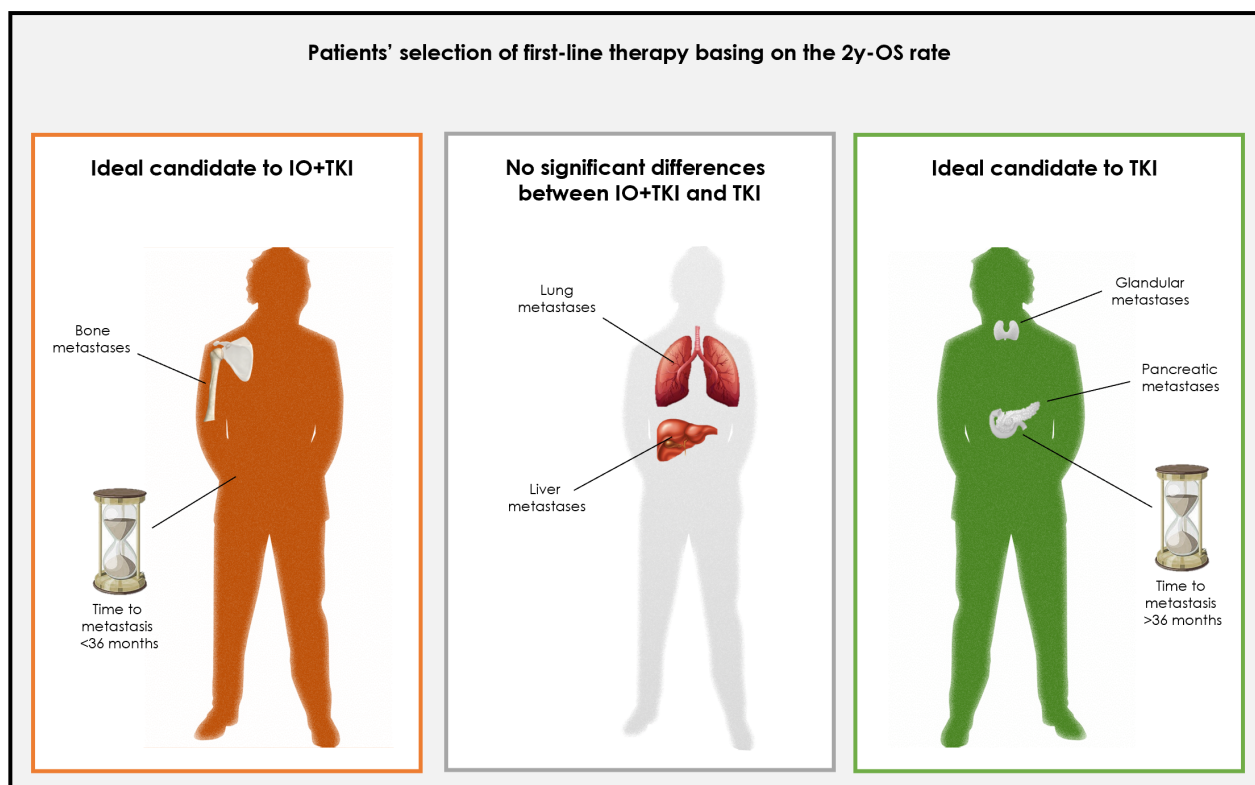

**Table Supplementary 1.** Univariate and multivariate analysis in favorable-risk RCC patients treated with IO+TKI.

| Overall Survival                 | Univariate Cox Regression |              | Multivariate Cox Regression |         |
|----------------------------------|---------------------------|--------------|-----------------------------|---------|
|                                  | HR (95%CI)                | p-value      | HR (95%CI)                  | p-value |
| Gender (females vs males)        | 1.09 (0.77–1.43)          | 0.798        |                             |         |
| Age ( $\geq 65y$ vs $< 65y$ )    | 1.42 (0.92–1.69)          | 0.421        |                             |         |
| Nephrectomy (yes vs no)          | 0.39 (0.15–1.03)          | 0.057        |                             |         |
| Histology (nccRCC vs ccRCC)      | 2.13 (0.80–5.66)          | 0.131        |                             |         |
| Sarcomatoid features (yes vs no) | 1.13 (0.87–2.27)          | 0.189        |                             |         |
| Lung metastases (yes vs no)      | 0.95 (0.45–2.04)          | 0.901        |                             |         |
| Bone metastases (yes vs no)      | 1.03 (0.43–2.46)          | 0.940        |                             |         |
| Liver metastases (yes vs no)     | 3.04 (1.15–8.06)          | <b>0.026</b> |                             |         |
| Brain metastases (yes vs no)     | 0.93 (0.10–5.36)          | 0.753        |                             |         |

| Glandular metastases (yes vs no)                                                                                                               | 1.22 (0.49–3.01)          | 0.678            |                             |         |
|------------------------------------------------------------------------------------------------------------------------------------------------|---------------------------|------------------|-----------------------------|---------|
| Time from RCC diagnosis to metastasis >36 vs ≤36 months                                                                                        | 0.95 (0.45–2.01)          | 0.903            |                             |         |
| Progression-Free Survival                                                                                                                      | Univariate Cox Regression |                  | Multivariate Cox regression |         |
|                                                                                                                                                | HR (95%CI)                | p-value          | HR (95%CI)                  | p-value |
| Gender (females vs males)                                                                                                                      | 1.16 (0.83–1.67)          | 0.478            |                             |         |
| Age (≥65y vs <65y)                                                                                                                             | 1.10 (0.91–1.62)          | 0.313            |                             |         |
| Nephrectomy (yes vs no)                                                                                                                        | 1.44 (0.58–3.57)          | 0.432            |                             |         |
| Histology (nccRCC vs ccRCC)                                                                                                                    | 1.58 (0.81–3.09)          | 0.184            |                             |         |
| Sarcomatoid features (yes vs no)                                                                                                               | 0.63 (0.19–2.01)          | 0.431            |                             |         |
| Lung metastases (yes vs no)                                                                                                                    | 1.31 (0.81–2.10)          | 0.274            |                             |         |
| Bone metastases (yes vs no)                                                                                                                    | 1.09 (0.64–1.85)          | 0.752            |                             |         |
| Liver metastases (yes vs no)                                                                                                                   | 4.08 (2.22–7.49)          | <b>&lt;0.001</b> |                             |         |
| Brain metastases (yes vs no)                                                                                                                   | 0.71 (0.22–2.27)          | 0.566            |                             |         |
| Glandular metastases (yes vs no)                                                                                                               | 1.15 (0.66–1.98)          | 0.627            |                             |         |
| Time from RCC diagnosis to metastasis >36 vs ≤36 months                                                                                        | 0.93 (0.59–1.47)          | 0.765            |                             |         |
| ccRCC = clear cell Renal Cell Carcinoma; IMDC = International Metastatic RCC Database Consortium; nccRCC = non-clear cell Renal Cell Carcinoma |                           |                  |                             |         |

**Table Supplementary 2.** Univariate and multivariate analysis in favorable-risk RCC patients treated with sunitinib.

| Overall Survival                 | Univariate Cox Regression |              | Multivariate Cox Regression |              |
|----------------------------------|---------------------------|--------------|-----------------------------|--------------|
|                                  | HR (95%CI)                | p-value      | HR (95%CI)                  | p-value      |
| Gender (females vs males)        | 1.05 (0.83–1.76)          | 0.764        |                             |              |
| Age (≥ 65y vs < 65y)             | 1.32 (0.89–1.76)          | 0.341        |                             |              |
| Nephrectomy (yes vs no)          | 1.10 (0.35–3.47)          | 0.868        |                             |              |
| Histology (nccRCC vs ccRCC)      | 1.14 (0.73–1.78)          | 0.565        |                             |              |
| Sarcomatoid features (yes vs no) | 2.06 (1.18–3.60)          | <b>0.012</b> | 1.67 (0.96–2.90)            | 0.071        |
| Lung metastases (yes vs no)      | 0.95 (0.67–1.35)          | 0.782        |                             |              |
| Bone metastases (yes vs no)      | 1.08 (0.71–1.66)          | 0.712        |                             |              |
| Liver metastases (yes vs no)     | 1.80 (1.19–2.72)          | <b>0.005</b> | 1.89 (1.29–2.78)            | <b>0.001</b> |
| Brain metastases (yes vs no)     | 0.98 (0.45–2.11)          | 0.962        |                             |              |

|                                                                                                                                                   |                                  |                  |                                    |                |
|---------------------------------------------------------------------------------------------------------------------------------------------------|----------------------------------|------------------|------------------------------------|----------------|
| Glandular metastases (yes vs no)                                                                                                                  | 0.71 (0.40–1.26)                 | 0.245            |                                    |                |
| Time from RCC diagnosis to metastasis >36 vs ≤36 months                                                                                           | 0.74 (0.53–1.03)                 | 0.071            |                                    |                |
| <b>Progression-Free Survival</b>                                                                                                                  | <b>Univariate Cox Regression</b> |                  | <b>Multivariate Cox regression</b> |                |
|                                                                                                                                                   | <b>HR (95%CI)</b>                | <b>p-value</b>   | <b>HR (95%CI)</b>                  | <b>p-value</b> |
| Gender (females vs males)                                                                                                                         | 1.18 (0.88–1.77)                 | 0.589            |                                    |                |
| Age (≥65y vs <65y)                                                                                                                                | 1.17 (0.95–1.56)                 | 0.653            |                                    |                |
| Nephrectomy (yes vs no)                                                                                                                           | 1.96 (0.62–6.15)                 | 0.249            |                                    |                |
| Histology (nccRCC vs ccRCC)                                                                                                                       | 2.15 (1.43–3.24)                 | <b>&lt;0.001</b> |                                    |                |
| Sarcomatoid features (yes vs no)                                                                                                                  | 1.61 (0.84–3.10)                 | 0.153            |                                    |                |
| Lung metastases (yes vs no)                                                                                                                       | 1.02 (0.73–1.41)                 | 0.929            |                                    |                |
| Bone metastases (yes vs no)                                                                                                                       | 1.30 (0.89–1.90)                 | 0.170            |                                    |                |
| Liver metastases (yes vs no)                                                                                                                      | 1.29 (0.86–1.92)                 | 0.216            |                                    |                |
| Brain metastases (yes vs no)                                                                                                                      | 1.26 (0.68–2.33)                 | 0.459            |                                    |                |
| Glandular metastases (yes vs no)                                                                                                                  | 0.84 (0.54–1.32)                 | 0.453            |                                    |                |
| Time from RCC diagnosis to metastasis >36 vs ≤36 months                                                                                           | 0.74 (0.53–1.02)                 | 0.220            |                                    |                |
| ccRCC = clear cell Renal Cell Carcinoma; IMDC = International Metastatic RCC Database Consortium;<br>nccRCC = non-clear cell Renal Cell Carcinoma |                                  |                  |                                    |                |
