# Supplementary material for: First-line immune-based combinations or sunitinib in favorable-risk metastatic renal cell carcinoma: a real-world retrospective comparison from the ARON-1 study
Source: Springer Nature journal article supplement (doi:10.1007/s00262-024-03897-x), 2025-01-03
Supplement: MOESM2 [file 262_2024_3897_MOESM2_ESM.pdf]

**Table 4.** Univariate and multivariate analysis in favorable-risk RCC patients.

| Overall Survival                                        | Univariate Cox Regression |                   | Multivariate Cox Regression |                   |
|---------------------------------------------------------|---------------------------|-------------------|-----------------------------|-------------------|
|                                                         | HR (95%CI)                | p-value           | HR (95%CI)                  | p-value           |
| Gender (females vs males)                               | 1.02 (0.71–1.48)          | 0.899             |                             |                   |
| Age (≥ 65y vs < 65y)                                    | 1.47 (0.94–1.97)          | 0.341             |                             |                   |
| Nephrectomy (yes vs no)                                 | 0.65 (0.32–1.33)          | 0.241             |                             |                   |
| Histology (nccRCC vs ccRCC)                             | 1.28 (0.85–1.92)          | 0.241             |                             |                   |
| Sarcomatoid features (yes vs no)                        | 1.60 (0.92–2.79)          | 0.094             |                             |                   |
| Lung metastases (yes vs no)                             | 0.97 (0.71–1.33)          | 0.852             |                             |                   |
| Bone metastases (yes vs no)                             | 1.03 (0.70–1.50)          | 0.896             |                             |                   |
| Liver metastases (yes vs no)                            | 1.92 (1.32–2.81)          | <b>&lt;0.001</b>  |                             |                   |
| Brain metastases (yes vs no)                            | 0.96 (0.47–1.96)          | 0.911             |                             |                   |
| Glandular metastases (yes vs no)                        | 0.78 (0.49–1.27)          | 0.320             |                             |                   |
| Time from RCC diagnosis to metastasis >36 vs ≤36 months | 0.73 (0.54–1.00)          | 0.059             |                             |                   |
| Sunitinib vs TKI plus ICI                               | 1.08 (0.69–1.67)          | 0.741             |                             |                   |
| <b>Progression-Free Survival</b>                        |                           |                   |                             |                   |
| Progression-Free Survival                               | Univariate Cox Regression |                   | Multivariate Cox regression |                   |
|                                                         | HR (95%CI)                | p-value           | HR (95%CI)                  | p-value           |
| Gender (females vs males)                               | 1.08 (0.80–1.47)          | 0.607             |                             |                   |
| Age (≥65y vs <65y)                                      | 1.05 (0.84–1.31)          | 0.682             |                             |                   |
| Nephrectomy (yes vs no)                                 | 1.73 (0.85–3.50)          | 0.129             |                             |                   |
| Histology (nccRCC vs ccRCC)                             | 1.98 (1.40–2.80)          | <b>&lt; 0.001</b> | 1.85 (1.31–2.62)            | <b>&lt; 0.001</b> |
| Sarcomatoid features (yes vs no)                        | 1.11 (0.63–1.95)          | 0.711             |                             |                   |
| Lung metastases (yes vs no)                             | 1.12 (0.86–1.47)          | 0.410             |                             |                   |
| Bone metastases (yes vs no)                             | 1.15 (0.85–1.57)          | 0.837             |                             |                   |
| Liver metastases (yes vs no)                            | 1.81 (1.30–2.53)          | <b>&lt; 0.001</b> | 1.58 (1.12–2.22)            | <b>&lt; 0.009</b> |
| Brain metastases (yes vs no)                            | 1.12 (0.65–1.92)          | 0.688             |                             |                   |
| Glandular metastases (yes vs no)                        | 0.94 (0.67–1.33)          | 0.732             |                             |                   |
| Time from RCC diagnosis to metastasis >36 vs ≤36 months | 0.85 (0.65–1.10)          | 0.220             |                             |                   |

|                                                                                                                                                                                                                               |                  |              |                  |              |
|-------------------------------------------------------------------------------------------------------------------------------------------------------------------------------------------------------------------------------|------------------|--------------|------------------|--------------|
| Sunitinib vs TKI plus ICI                                                                                                                                                                                                     | 1.48 (1.12–1.95) | <b>0.006</b> | 1.36 (1.02–1.80) | <b>0.037</b> |
| <p>ccRCC = clear cell Renal Cell Carcinoma; IMDC = International Metastatic RCC Database Consortium;<br/> IO = immune-checkpoint inhibitor; nccRCC = non-clear cell Renal Cell Carcinoma; TKI = tyrosine kinase inhibitor</p> |                  |              |                  |              |
